# Supplementary material for: Palm oil and cardiovascular disease: a randomized trial of the effects of hybrid palm oil supplementation on human plasma lipid patterns
Source: Royal Society of Chemistry journal article supplement (doi:10.1039/c5fo01083g), 2015-10-08
Supplement: c5fo01083g1.pdf [file c5fo01083g1.pdf]

**Table S1.** Total daily energy intake and nutrients consumption of the studied subjects at the beginning (baseline) and at the end (visit 3) of the study

|                            | <u>HPO</u>      |                | <u>EVOO</u>     |                | <u>Overall population</u> |                |
|----------------------------|-----------------|----------------|-----------------|----------------|---------------------------|----------------|
|                            | <u>Baseline</u> | <u>Visit 3</u> | <u>Baseline</u> | <u>Visit 3</u> | <u>Baseline</u>           | <u>Visit 3</u> |
| <b>Energy (Kcal)</b>       | 1740 ± 502      | 1635 ± 388     | 1775 ± 465      | 1762 ± 536     | 1758 ± 484                | 1698 ± 472     |
| <b>Protein (g/d)</b>       | 62.9 ± 21.5     | 57.3 ± 17.1    | 65.9 ± 15.9     | 66.6 ± 27.4    | 64.4 ± 20.6               | 62.1 ± 23.3    |
| <b>Total Fat (g/d)</b>     | 48.1 ± 15.3     | 45.5 ± 17.4    | 46.8 ± 16.8     | 52.6 ± 21.6    | 47.5 ± 16.1               | 49.1 ± 19.7    |
| <b>SFA (g/d)</b>           | 14.0 ± 6.1      | 12.5 ± 5.4     | 13.8 ± 6.6      | 15.3 ± 9.1     | 13.6 ± 6.4                | 13.9 ± 7.6     |
| <b>MUFA (g/d)</b>          | 15.2 ± 6.5      | 13.9 ± 7.9     | 14.2 ± 7.3      | 17.1 ± 9.5     | 14.7 ± 7.1                | 15.4 ± 8.8     |
| <b>PUFA (g/d)</b>          | 13.9 ± 3.9      | 13.3 ± 3.7     | 13.9 ± 4.3      | 13.7 ± 4.4     | 13.9 ± 4.1                | 13.5 ± 4.1     |
| <b>Cholesterol (mg/d)</b>  | 252.2 ± 159.1   | 240.7 ± 161.1  | 266.3 ± 173.7   | 279.1 ± 197.9  | 259.3 ± 166.7             | 259.9 ± 181.4  |
| <b>Carbohydrates (g/d)</b> | 267.6 ± 96.1    | 251.4 ± 72.1   | 277.2 ± 84.5    | 261.4 ± 86.4   | 272.4 ± 90.6              | 256.4 ± 79.7   |

Data are expressed as mean and standard deviation

EVOO= extra-virgin olive oil

HPO= hybrid palm oil

SFA, saturated fatty acids; MUFA, monounsaturated fatty acids; PUFA, polyunsaturated fatty acids;

Significance (P < 0.05)
